# Supplementary material
Source: PubMed Central journal article supplement (PMC3981142)

Fig.3A

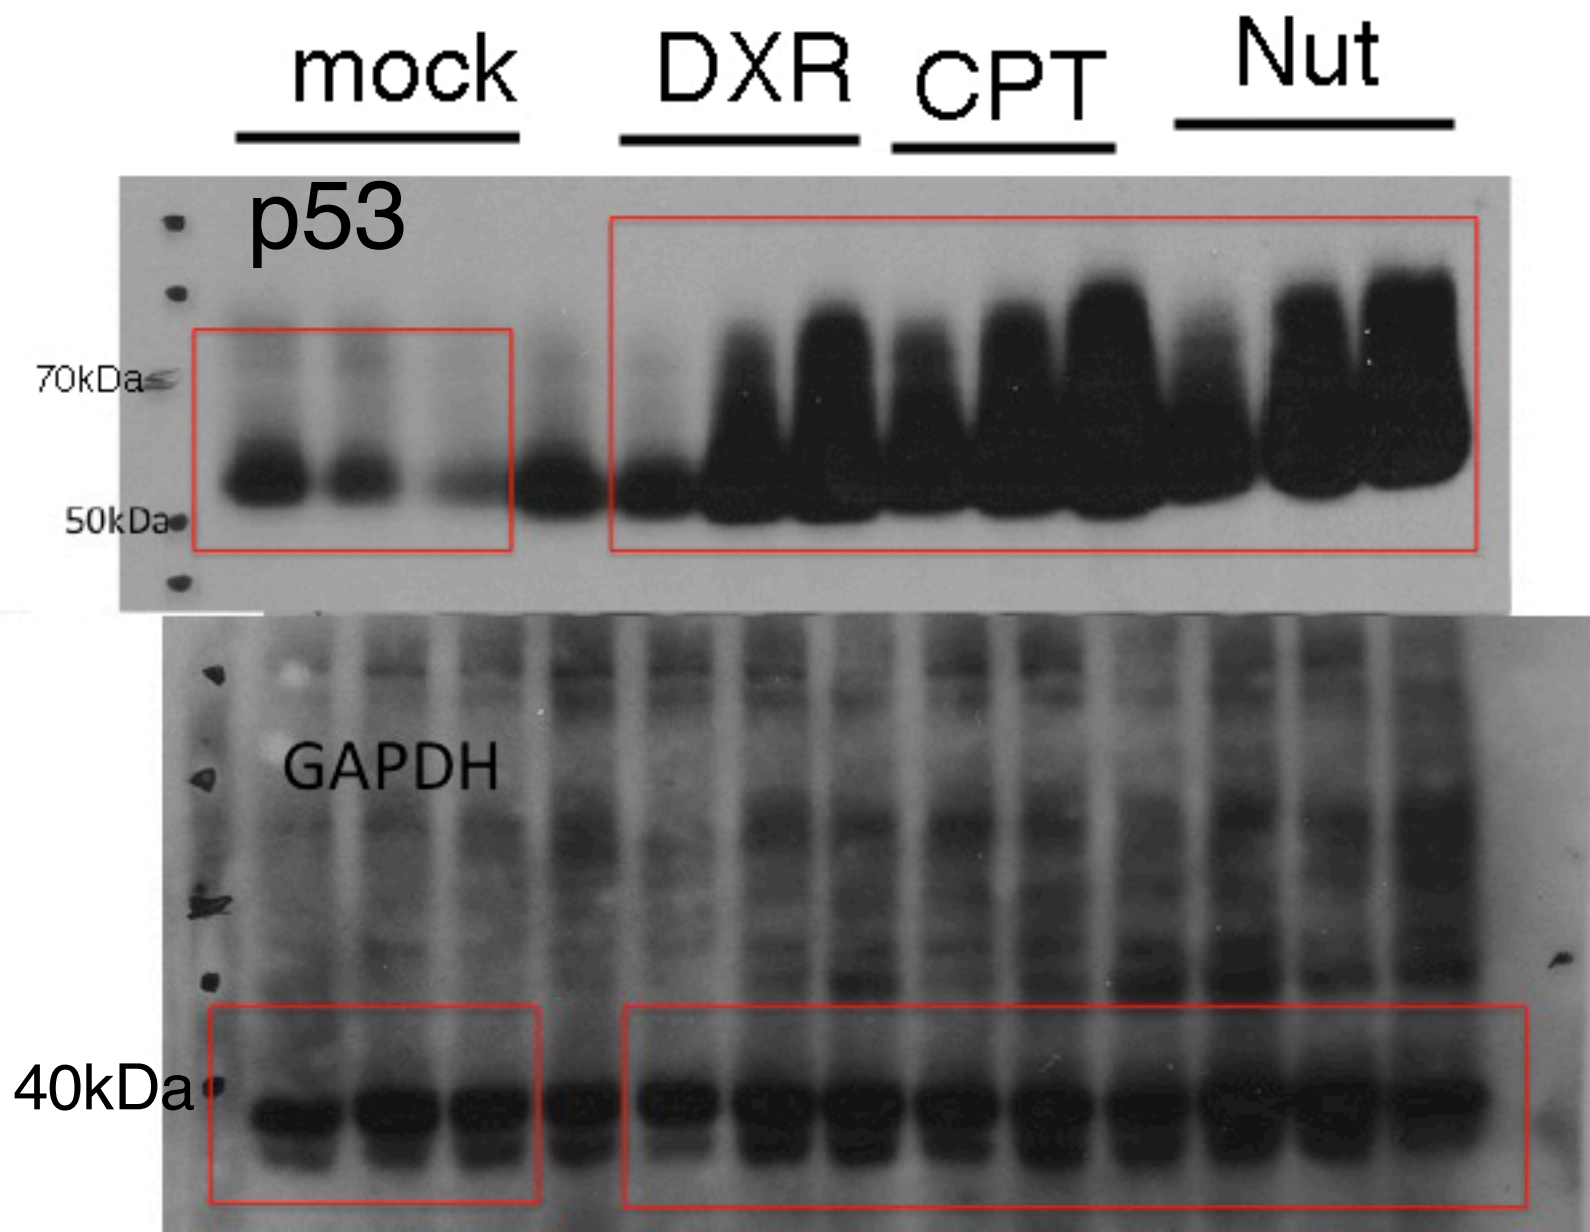

Fig. 3D

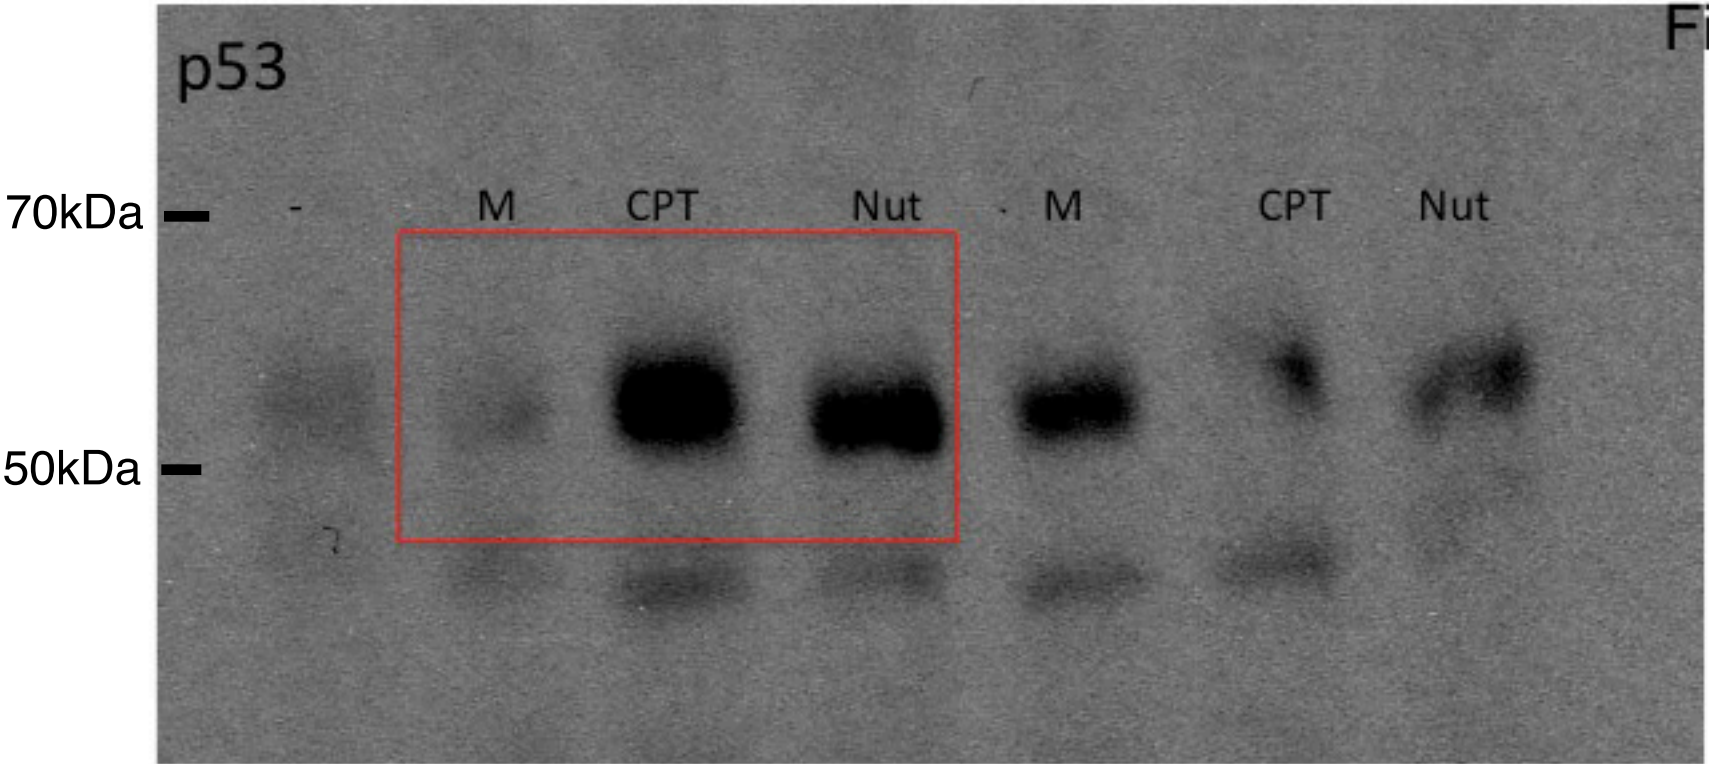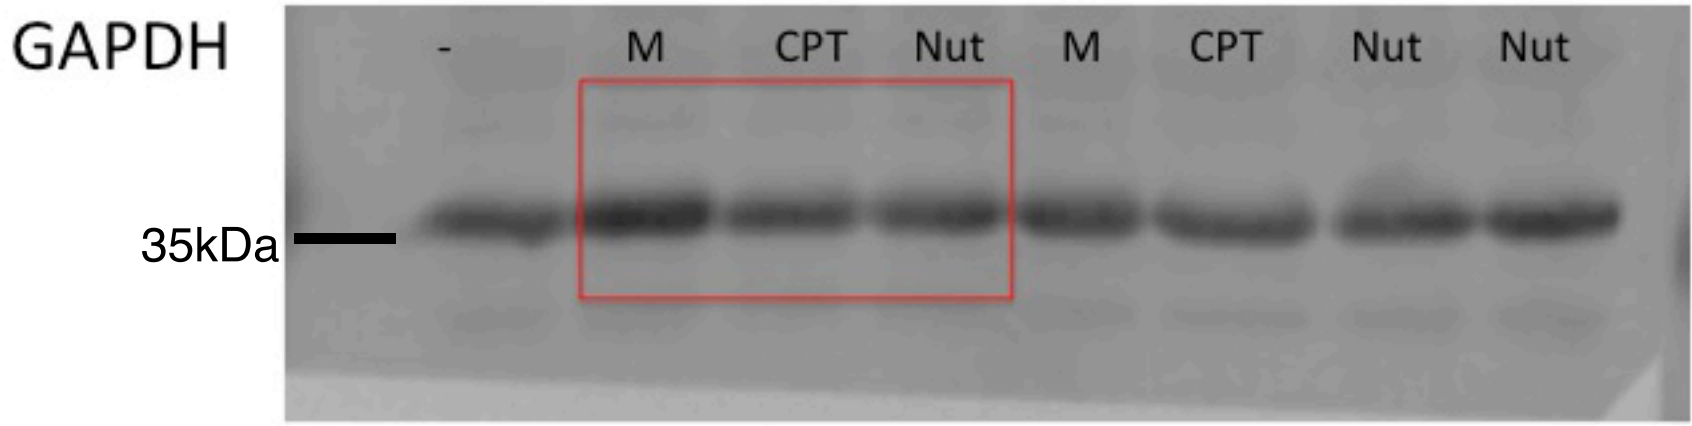

Supplement: emboj2013242df3.pdf [file emboj2013242df3.pdf]

Fig. 4A

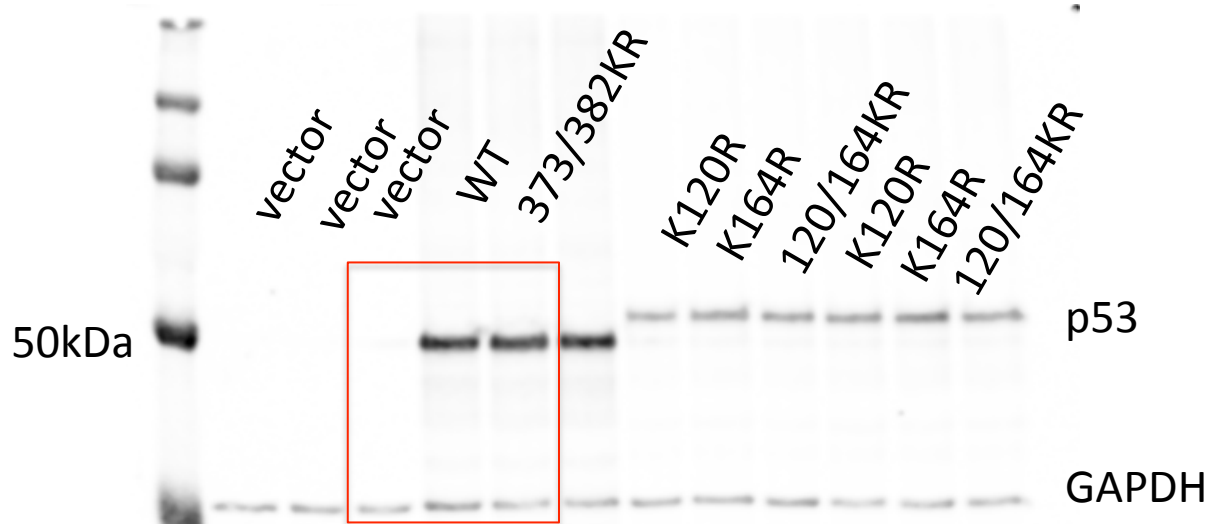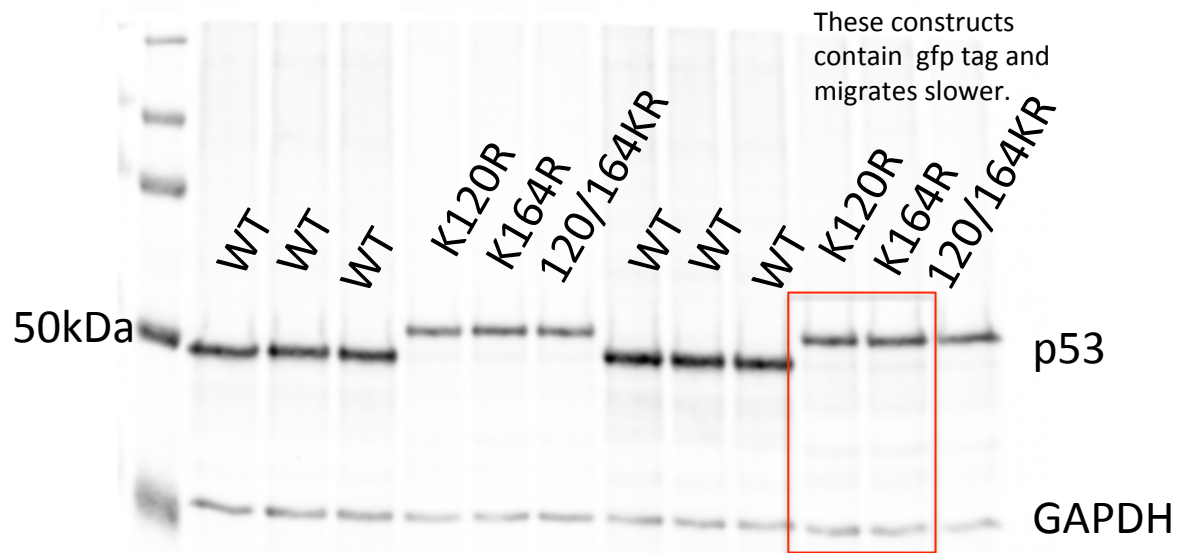

p53

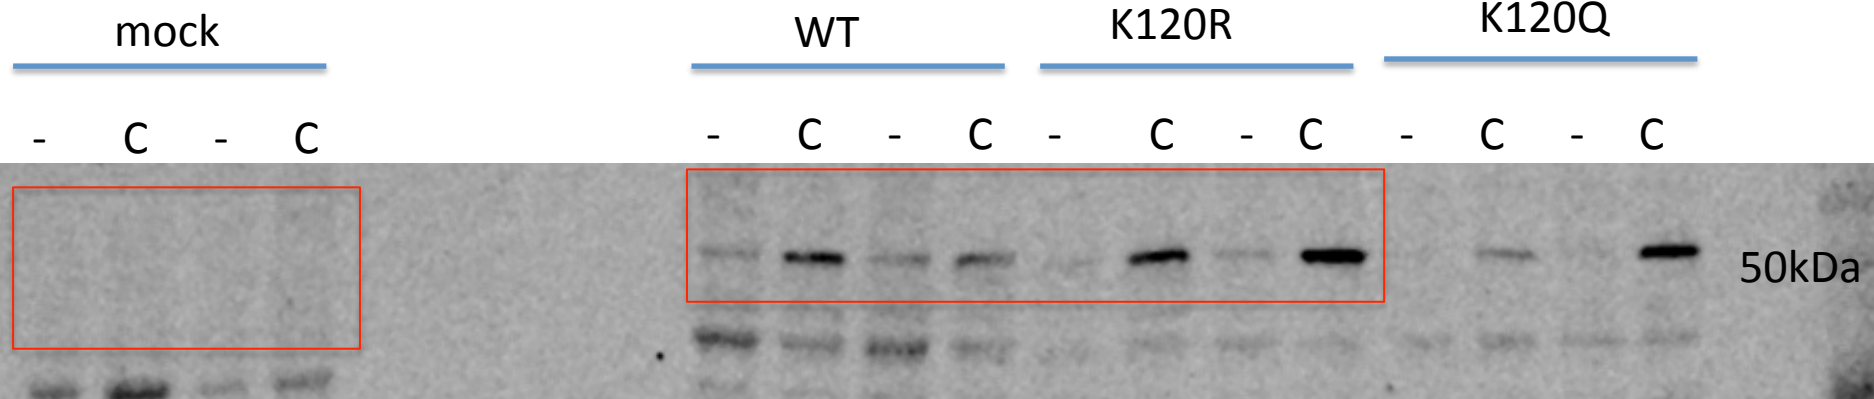

GAPDH

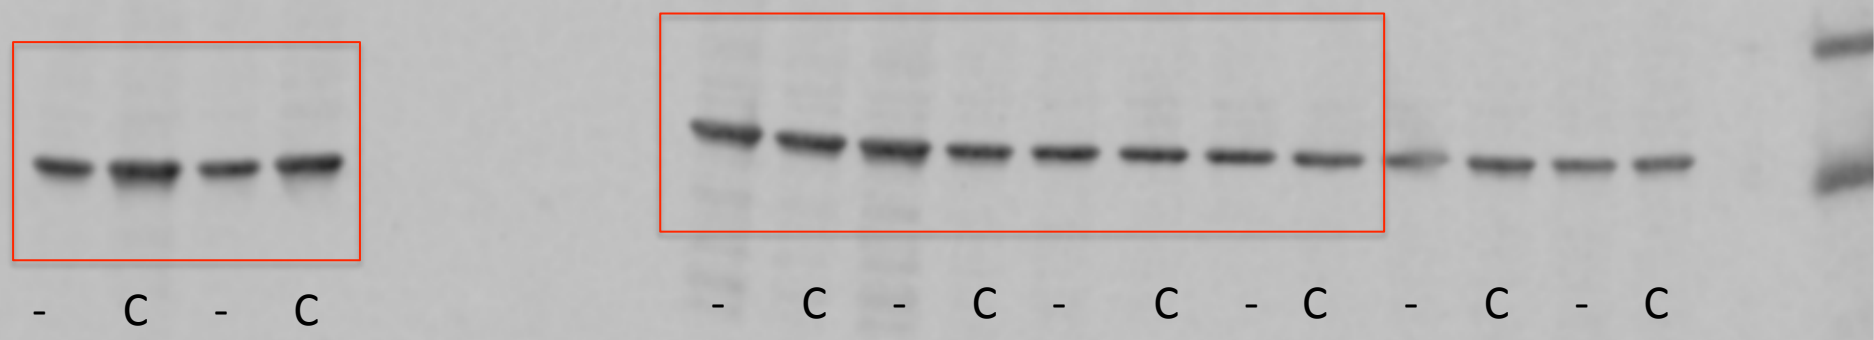

-:mock C: CPT

Supplement: emboj2013242df4.pdf [file emboj2013242df4.pdf]

Fig. 5A

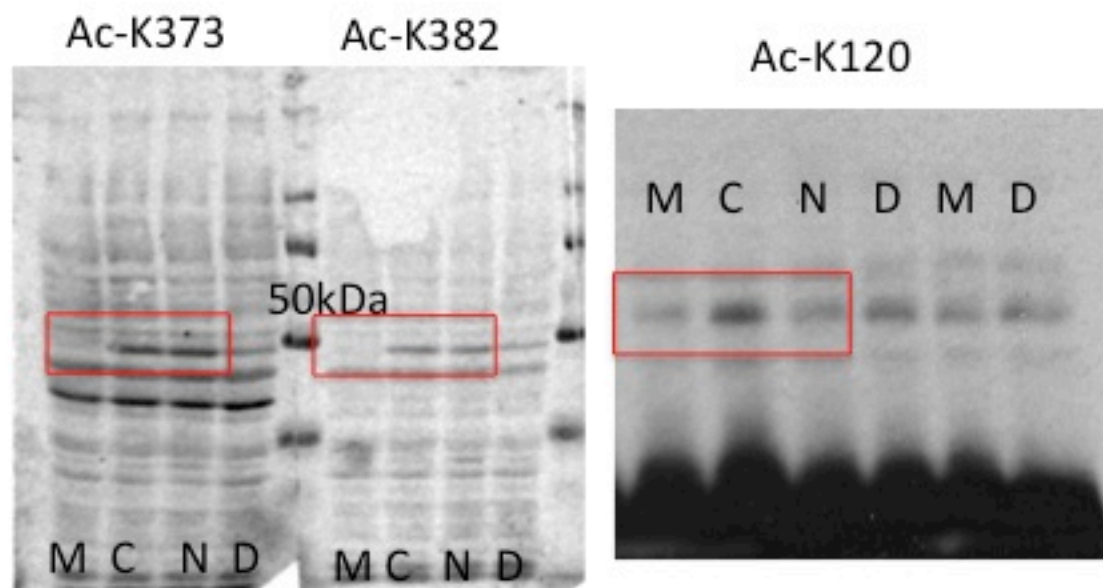

M:mock C: CPT D: Dxr N: nutlin3

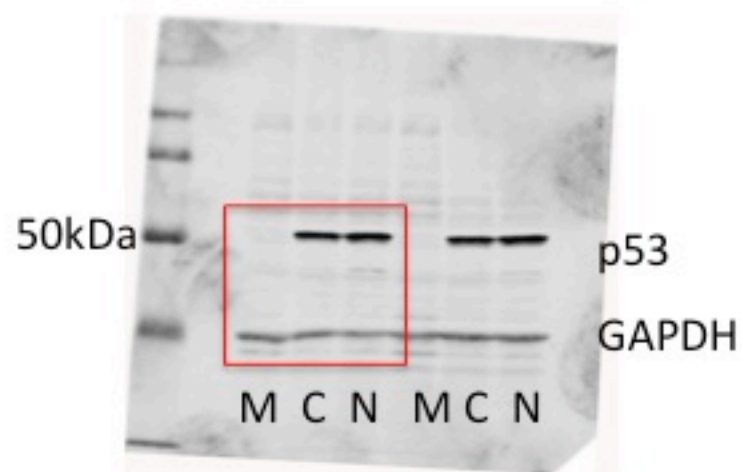

Fig. 5B

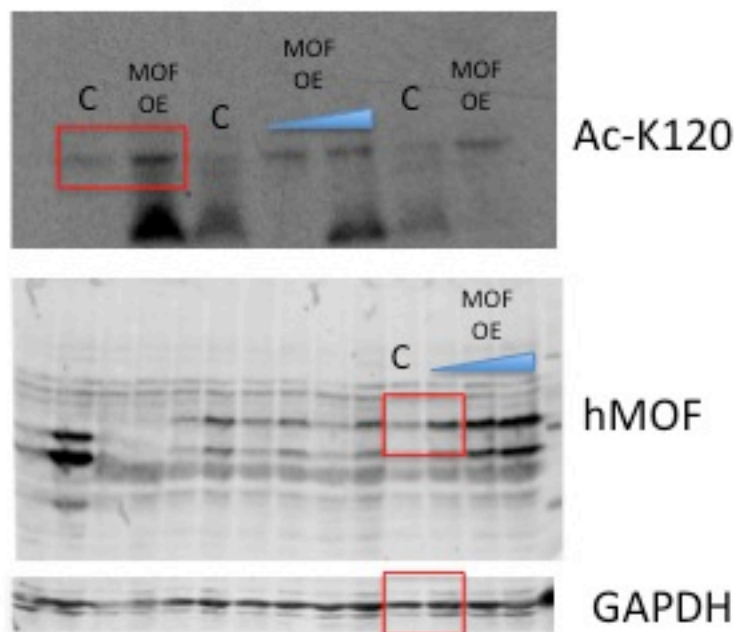

Fig. 5C

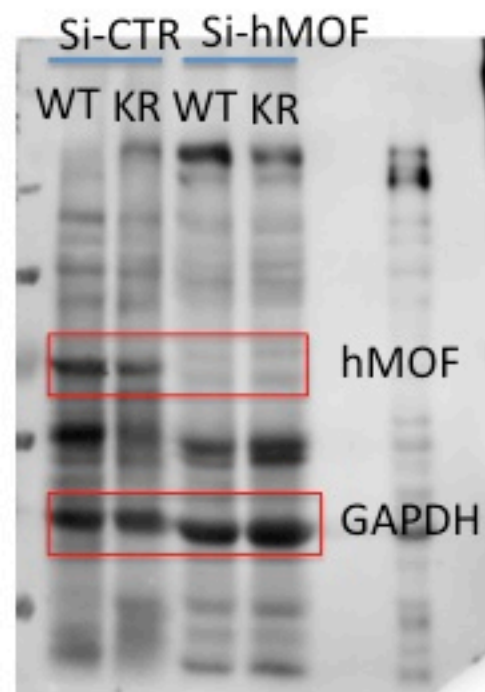

Fig. 5B,C,& E

Fig. 5E

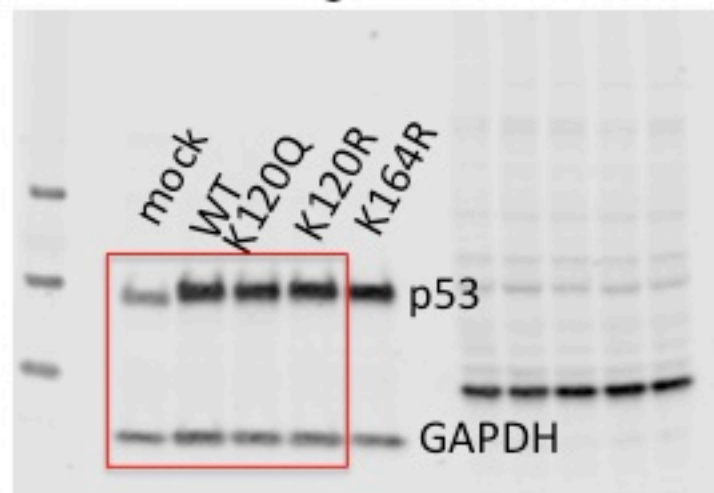

Supplement: emboj2013242df5.pdf [file emboj2013242df5.pdf]

Fig. 6A

input

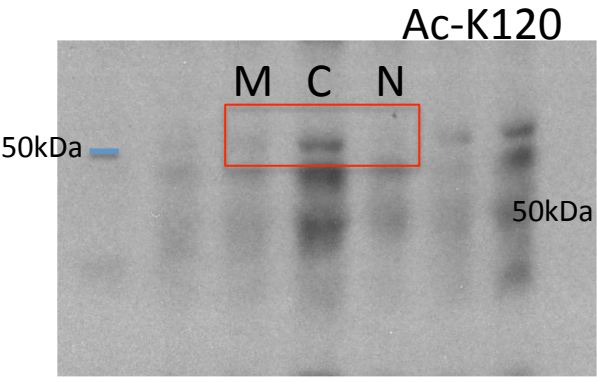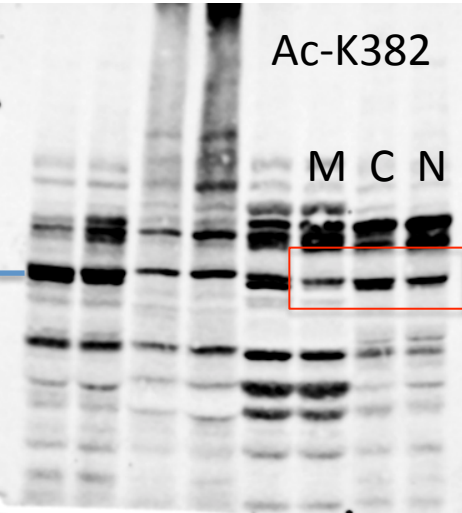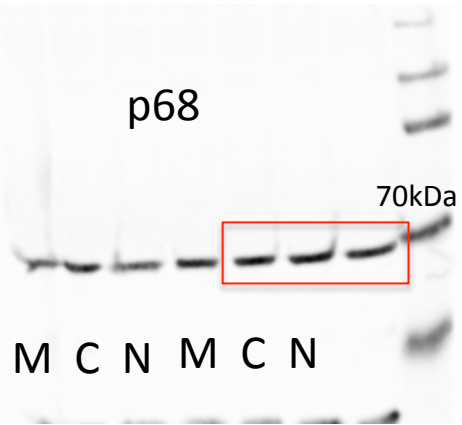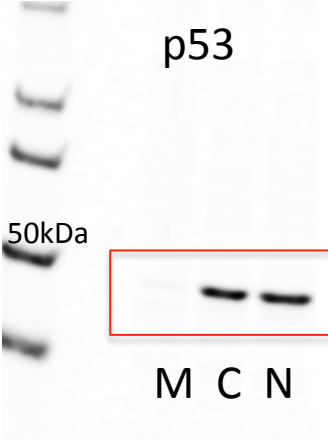

IP:p68

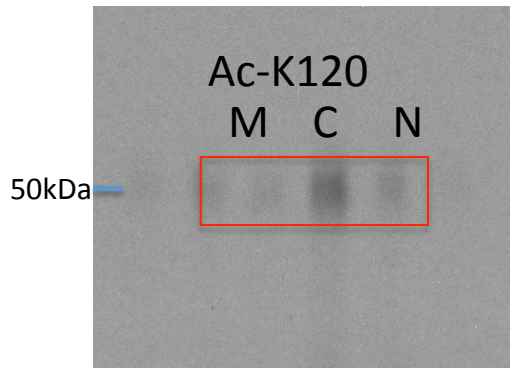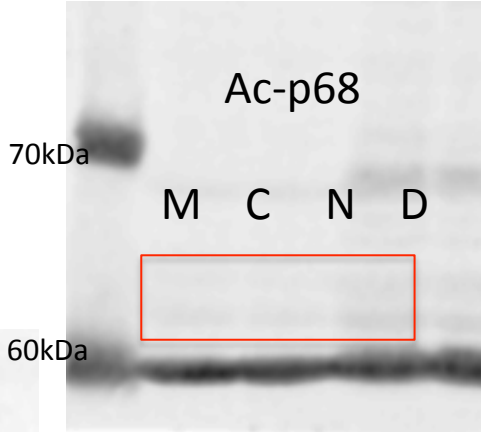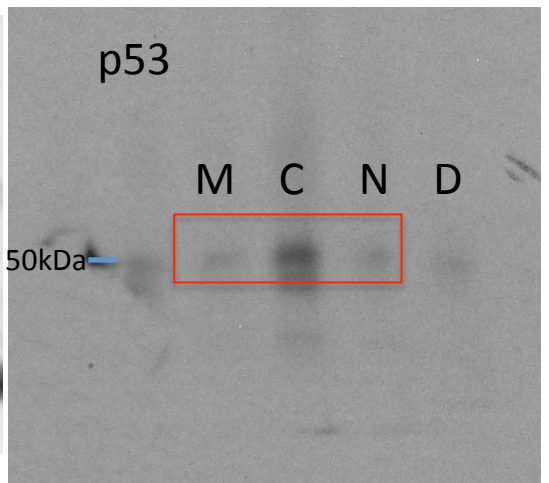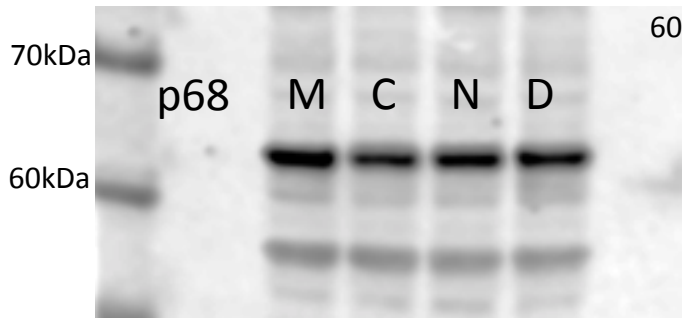

Fig. 6B

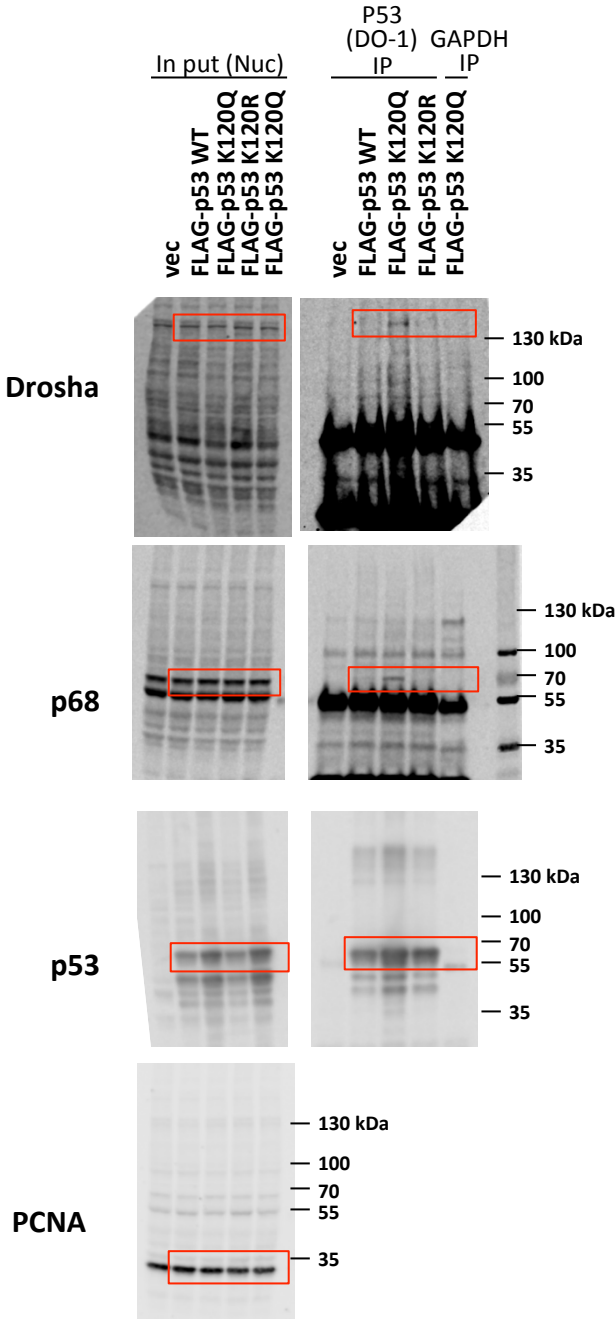

Fig. 6C

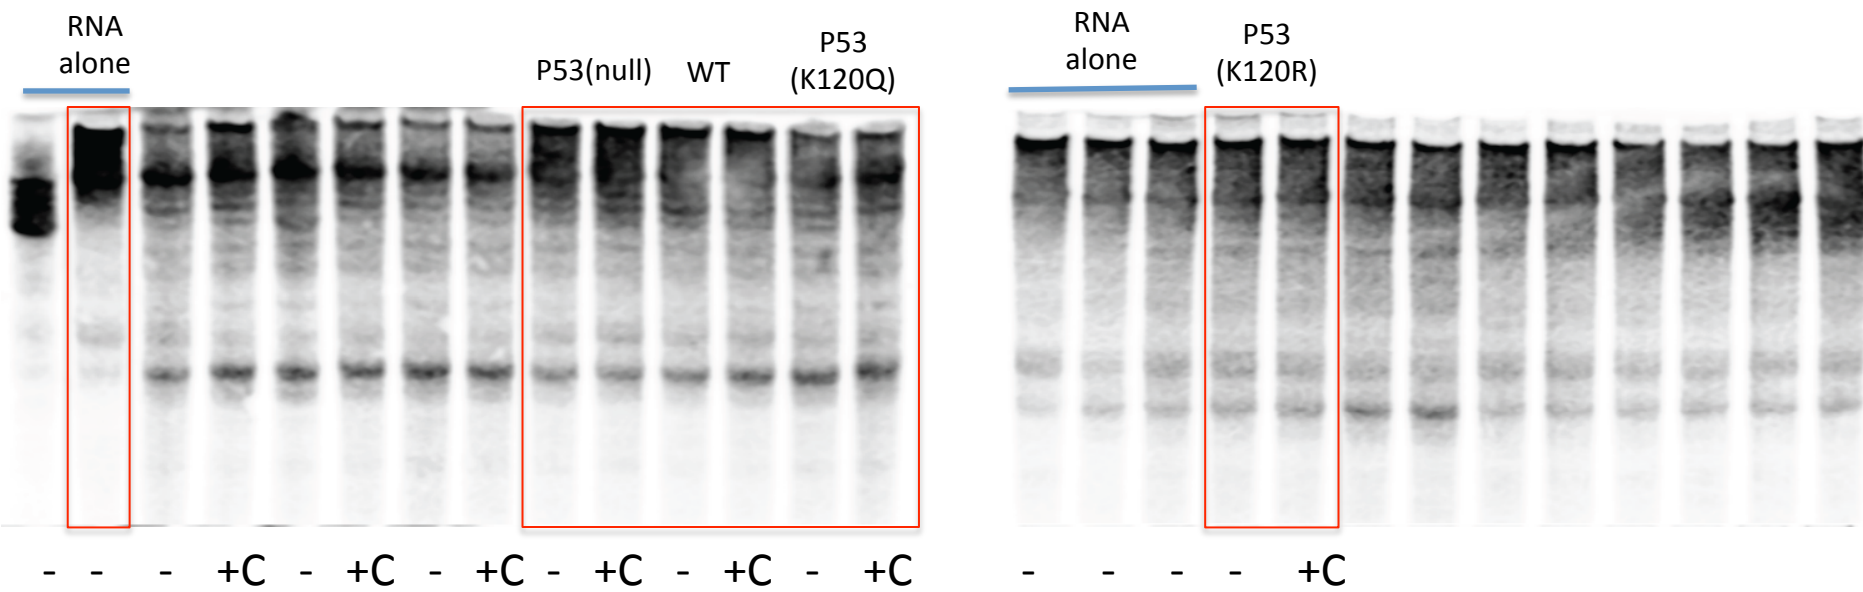

-:mock +C: CPT

Supplement: emboj2013242df6.pdf [file emboj2013242df6.pdf]
